# Supplementary material
Source: PubMed Central journal article supplement (PMC2276435)

**Supplemental Data. Wan et al. (2008). The Plant Cell.**

**A LysM Receptor-Like Kinase Plays a Critical Role in Chitin Signaling  
and Fungal Resistance in Arabidopsis**

Jinrong Wan,<sup>a</sup> Xue-Cheng Zhang,<sup>a</sup> David Neece,<sup>b</sup> Katrina M. Ramonell,<sup>c</sup> Steve  
Clough,<sup>b,d</sup> Sung-yong Kim,<sup>a</sup> Minviluz G. Stacey,<sup>a</sup> and Gary Stacey<sup>a,1</sup>

<sup>a</sup>Division of Plant Sciences, National Center for Soybean Biotechnology, C.S. Bond  
Life Sciences Center, University of Missouri-Columbia, Columbia, Missouri 65211

<sup>b</sup>Department of Crop Sciences, University of Illinois at Urbana-Champaign, Urbana,  
Illinois 61801

<sup>c</sup>Department of Biological Sciences, University of Alabama, Tuscaloosa, Alabama  
35487

<sup>d</sup>US Department of Agriculture, Soybean/Maize Germplasm, Pathology and Genetics  
Research, Urbana, Illinois 61801

<sup>1</sup>To whom correspondence should be addressed. E-mail [staceyg@missouri.edu](mailto:staceyg@missouri.edu); phone  
573-884-4752; fax 573-884-9676.

The author responsible for distribution of materials integral to the findings presented  
in this article in accordance with the policy described in the instructions for Authors  
([www.plantcell.org](http://www.plantcell.org)) is: Gary Stacey ([staceyg@missouri.edu](mailto:staceyg@missouri.edu)).

**Supplemental Figure 1.** Initial screen of the five LysM RLK mutants in response to chitin treatment. The *Arabidopsis* LysMRLK1 to 5 correspond to the genes At3g21630, At1g51940, At2g33580, At2g23770, and At3g01840, respectively. Both the mutant and wild-type Col 0 plants were treated with the purified chitin oligomer chitooctase for 30 minutes. Meanwhile, wild-type Col 0 plants were also similarly treated with water (as a negative control). The expression of the selected chitin-responsive genes (CRGs) in both the mutant and wild-type plants was analyzed using RT-PCR. *Actin-2* was used as an internal control and the amplification of both *actin-2* and a CRG was conducted in the same PCR reaction tube.

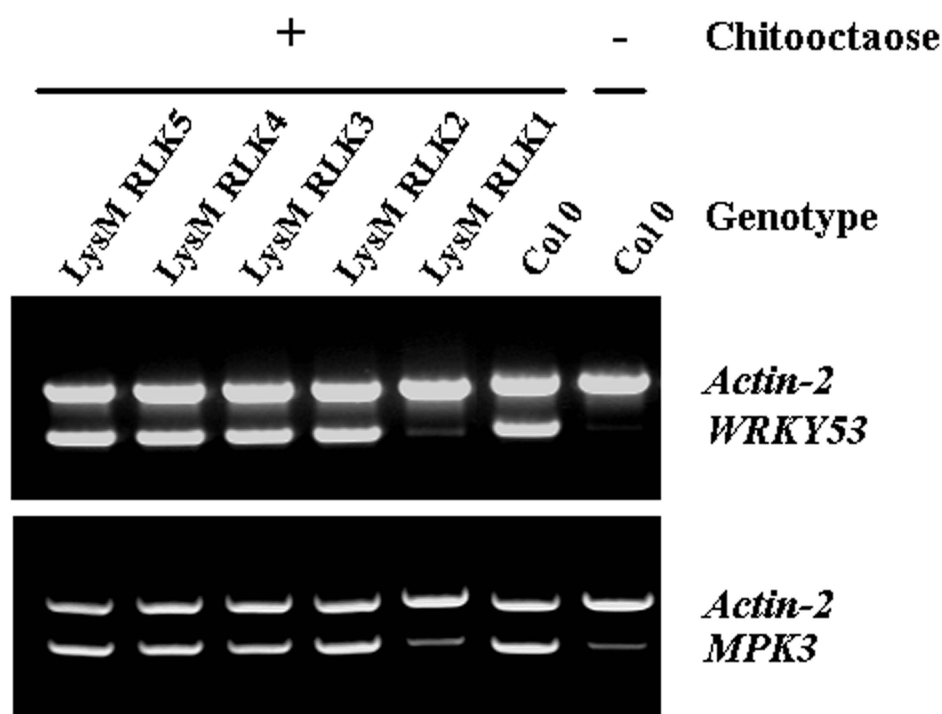

**Supplemental Figure 2.** Expression analysis of the *LysM RLK1* gene in different tissues or organs using RT-PCR. RT-PCR was conducted using equivalent amounts of cDNA derived from different tissues or organs. *Actin-2* served as an internal control and the amplification of both *actin-2* and the *LysM RLK1* gene was conducted in the same PCR reaction tube with 25 cycles.

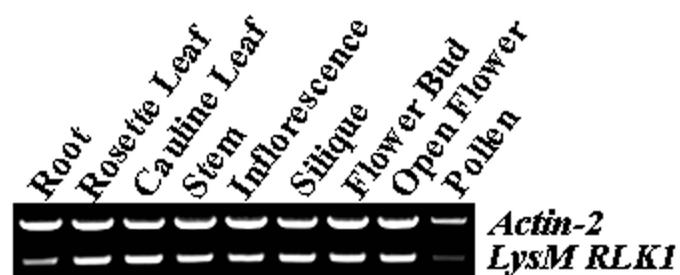

**Supplemental Figure 3.** The selected CRGs were still induced in the *LysMRLK1* mutant by a fungal pathogen, but to a reduced level. (A) Analysis of the *MPK3* gene expression in both the mutant and wild-type plants in response to a fungal pathogen. (B) Analysis of the *WRKY53* gene expression in both the mutant and wild-type plants in response to a fungal pathogen. In both (A) and (B), the gene induction by the fungal pathogen *A. brassicicola* was monitored by quantitative RT-PCR at different time points after inoculation. Each data point was the average of the relative gene expression (fold change, normalized to *actin-2* and relative to the time 0 sample) from three biological replicates. Error bar = standard error. WT = wild-type Col-0; Mu = *LysMRLK1* mutant.

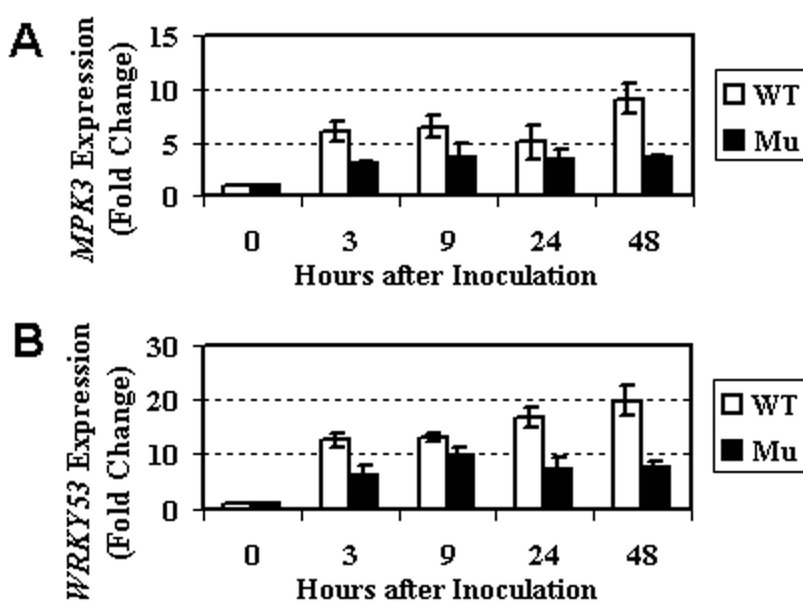

**Supplemental Figure 4.** The mutation in the *LysM RLK1* gene did not affect other defense-related pathways. (A) Analysis of *PR-1* expression in response to salicylic acid (SA) in both the mutant and wild-type plants by quantitative PCR. (B) Analysis of *PDF1.2* expression in response to methyl jasmonic acid (MeJA) in both the mutant and wild-type plants by quantitative PCR. (C) Analysis of *PDF1.2* expression in response to 1-aminocyclopropane-1-carboxylic acid (ACC) in both the mutant and wild-type plants by quantitative PCR. In the above experiments, each data point was the average of the relative gene expression (fold change, normalized to *actin-2* and relative to the control sample) from three replicates. Error bar = standard error. No statistically significant differences were found between the mutant and wild type in the induction of the above genes based on a Student's t-test.

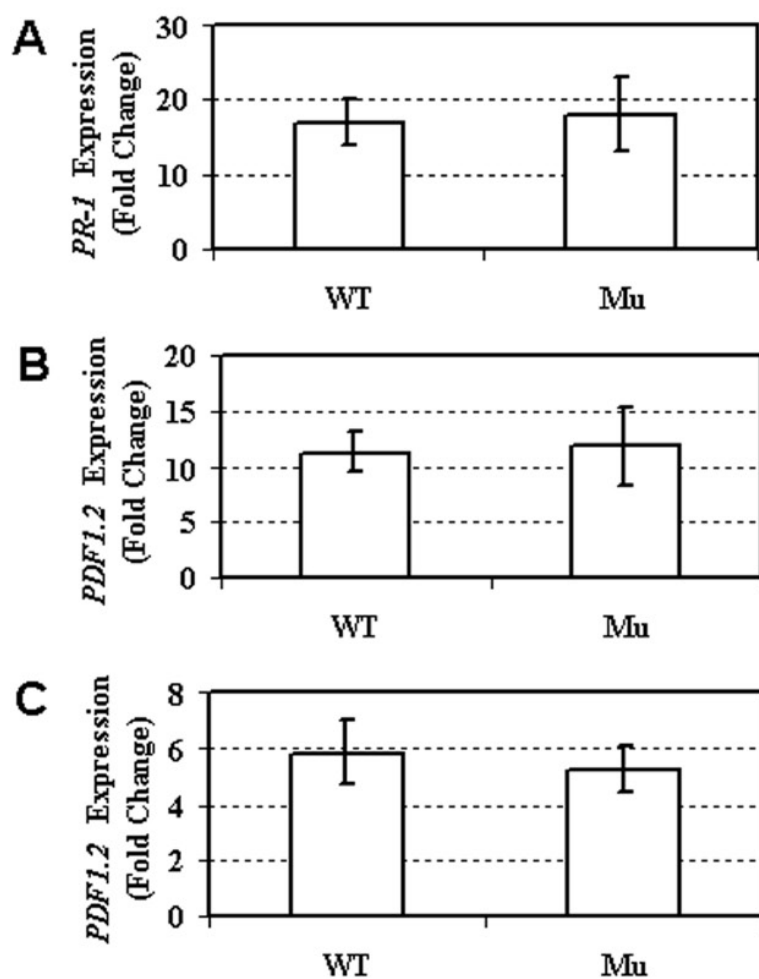

**Supplemental Figure 5.** The mutations in the Nod factor receptor genes *NFR1* and *NFR5* in the legume *Lotus japonicus* did not affect the induction of the selected CRGs in the plant. Both the wild type (Gifu) and the Nod factor receptor mutants *nfr1-1* and *nfr5-1* were treated with chitooctase for 30 minutes at a concentration of 1  $\mu$ M or with water (as a control). The selected CRGs were detected using RT-PCR. Lj *Actin-2* was used as an internal control and the amplification of both Lj *actin-2* and a CRG was conducted in the same PCR reaction tube with 25 cycles. The experiment was repeated twice with similar results.

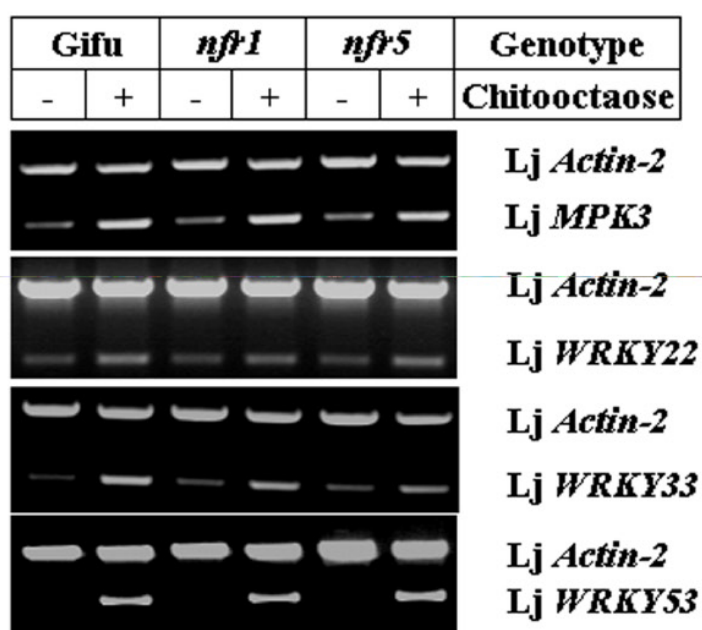

Supplement: plntcell_tpc.107.056754_1.pdf [file plntcell_tpc.107.056754_1.pdf]
